# Supplementary material for: Bariatric Surgery Is Associated with Alcohol-Related Liver Disease and Psychiatric Disorders Associated with AUD
Source: PubMed Central journal article supplement (PMC10156826; doi:10.1007/s11695-023-06490-w), 2023-03-07
Supplement: 11695_2023_6490_MOESM1_ESM.pdf [file 11695_2023_6490_MOESM1_ESM.pdf]

**BARIATRIC SURGERY IS ASSOCIATED WITH ALCOHOL-RELATED LIVER DISEASE AND PSYCHIATRIC DISORDERS ASSOCIATED WITH AUD (Reviewer 2, comment 02).**

## SUPPLEMENTARY MATERIAL

### **Figure 1S. Graphical summary of the study design.**

Finally selected population, main outcomes, and variables obtained from hospital discharges information between the years 2005-2015.

### **Figure 2S. Impact of bariatric surgery on the development of vitamin D deficiency.**

Results are expressed as annual fold-change increases from baseline and the overall prevalence (%) of vitamin D deficiency from 2005 to 2015 in the bariatric surgery vs the abdominal surgery group.

### **Figure 3S. Impact of bariatric surgery on liver disease of different etiologies**

Results are expressed as frequencies (%). Prevalence of the main 2 etiologies.

Abbreviations: ALD, Alcohol-related liver disease; NAFLD, Non-alcoholic fatty liver disease.

### **Figure 4S. Impact of vitamin D deficiency on the development of alcohol-related organ damage in the bariatric surgery group.**

Data are expressed as frequencies (%) according to vitamin D status. **(a)** Prevalence of alcohol use disorder. **(b)** Prevalence of alcohol-related liver disease. **(c)** Prevalence of cirrhosis. **(d)** Prevalence of **psychiatric disorders associated with AUD (Reviewer 2, comment 02)**.

**TABLE 1S.** ICD-9 codes used for cohort selection and comorbidities, as well as excluded diagnoses.

ICD-9

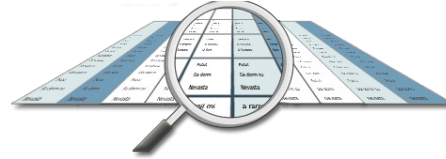

2005

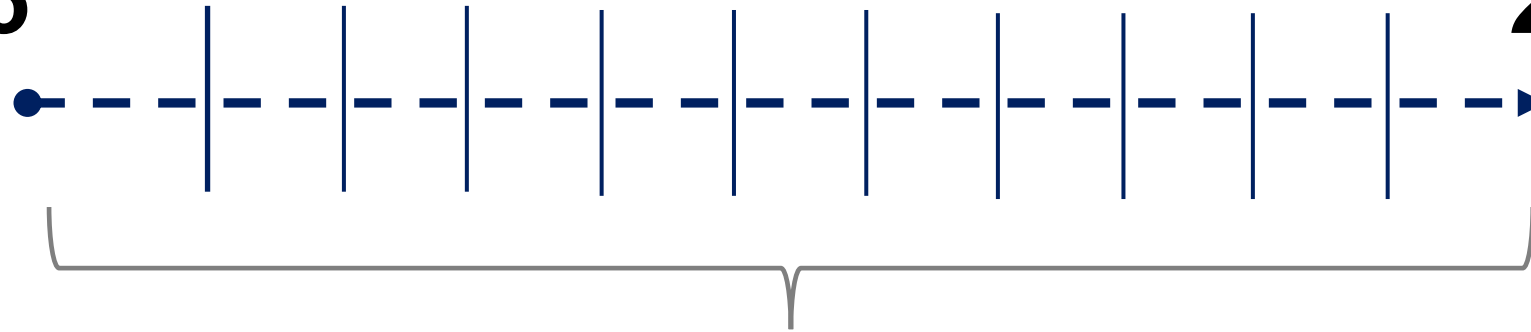

2015

- **Design:** yearly cross-sectional observational study using NIS database and ICD-9 codes
  - **Inclusion:** hospital discharges with history of bariatric or abdominal surgery
  - **Exclusion:** cases with the outcomes of interest present prior to surgery
    - **Evaluation:** propensity score matching performed prior to surgery
- **Outcomes of interest:** AUD, ALD, psychiatric disorders associated with AUD

**Fig. 1S**

# Vitamin D Deficiency

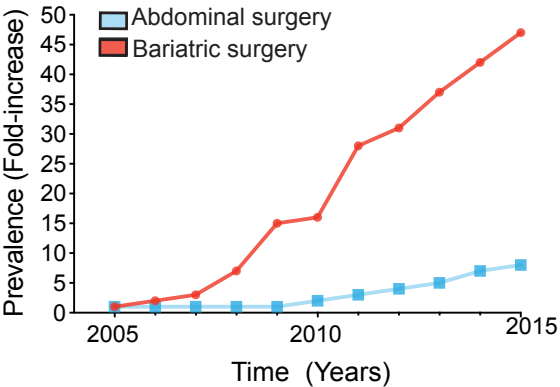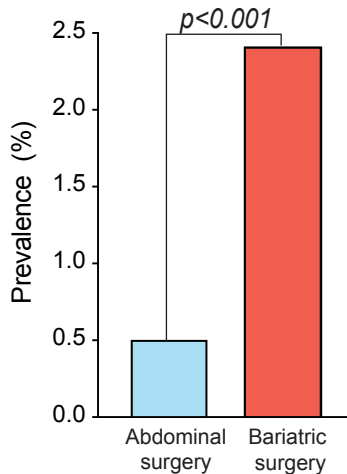

**Fig. 2S**

# Liver Disease Etiologies

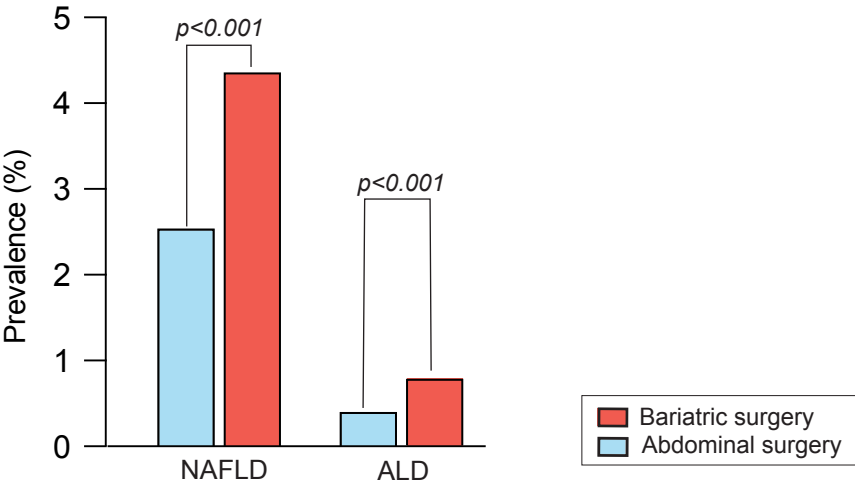

**Fig. 3S**

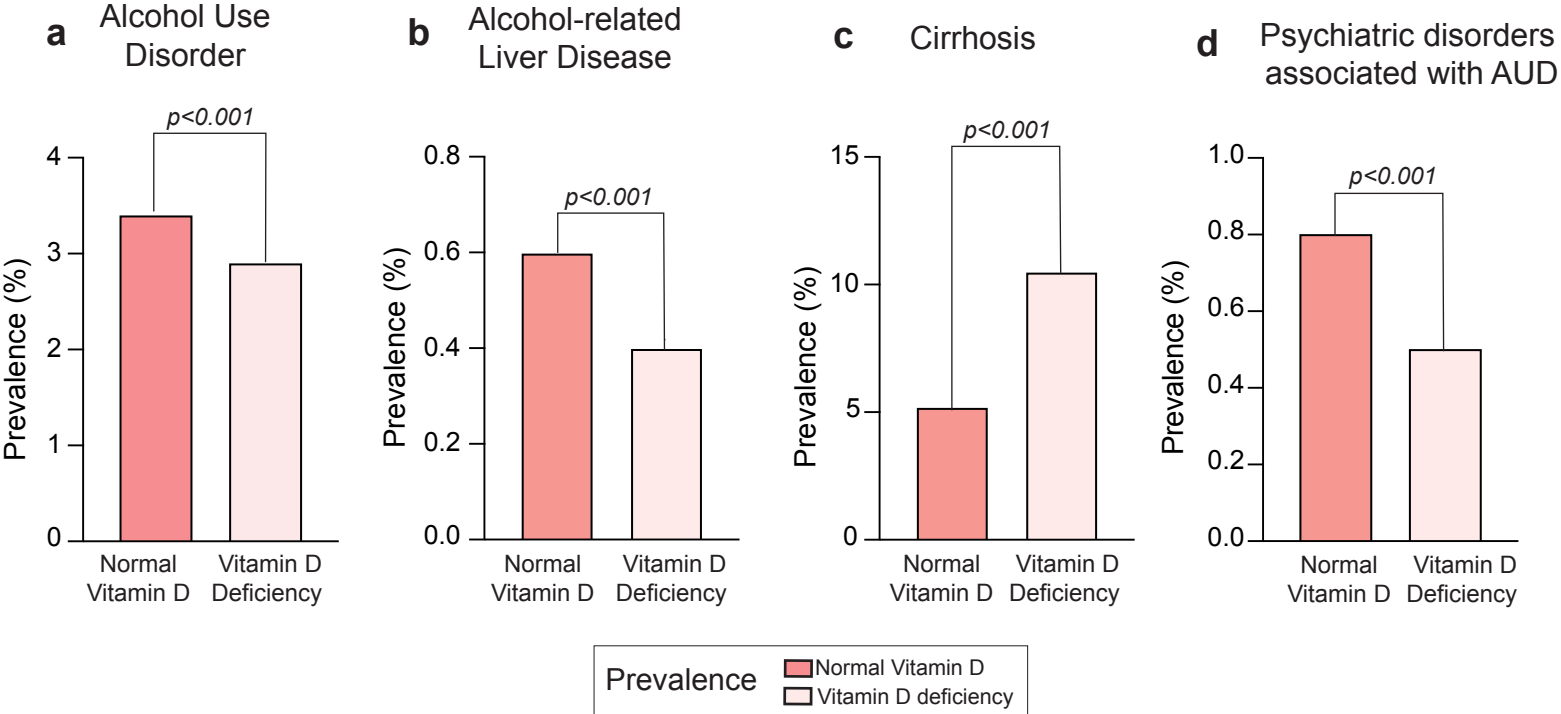

**Fig. 4S**

**TABLE 1S.** ICD-9 codes used for cohort selection and comorbidities, as well as excluded diagnostics.

| <b>DIAGNOSIS</b>                                                                    | <b>ICD-9 CODES</b>                                                                  |
|-------------------------------------------------------------------------------------|-------------------------------------------------------------------------------------|
| <b>BARIATRIC SURGERY</b>                                                            |                                                                                     |
| Bariatric surgery status                                                            | V45.86                                                                              |
| Fitting and adjustment of gastric lap                                               | V53.51                                                                              |
| Complications of bariatric surgery                                                  | 539.X                                                                               |
| Gastric restrictive procedure                                                       | 44.69                                                                               |
| Laparoscopic vertical (sleeve) gastrectomy                                          | 43.82, 43.89                                                                        |
| Laparoscopic adjustable gastric band                                                | 44.95                                                                               |
| Replacement/adjustment of gastric band                                              | 44.96,44.98                                                                         |
| Gastric bypass                                                                      | 44.32                                                                               |
| Malabsorption (gastric bypass)                                                      | 579,3                                                                               |
| Partial gastrectomy with bypass gastro-gastrostomy                                  | 43.89                                                                               |
| High gastric bypass                                                                 | 44.31                                                                               |
| Laparoscopic gastric bypass with small intestine reconstruction to limit absorption | 44.38,44.39                                                                         |
| Open Roux-en-Y gastric bypass                                                       | 44.39, 44.31                                                                        |
| <b>ABDOMINAL SURGERIES</b>                                                          |                                                                                     |
| Appendectomy                                                                        | 47.0                                                                                |
| Incidental appendectomy                                                             | 47.1                                                                                |
| Laparoscopic appendectomy                                                           | 47.01                                                                               |
| Laparoscopic incidental appendectomy                                                | 47.1                                                                                |
| Cholecystectomy                                                                     | 51.22                                                                               |
| Laparoscopic cholecystectomy                                                        | 51.23                                                                               |
| <b>ALCOHOL</b>                                                                      |                                                                                     |
| <b>Alcohol use disorder.</b>                                                        |                                                                                     |
| Alcohol dependence syndrome                                                         | 303.x (0/00/01/02/03/9/90/91/92/93)                                                 |
| Acute alcoholic intoxication in alcoholism, unspecified                             | 303,00                                                                              |
| Acute alcoholic intoxication in alcoholism, continuous                              | 303,01                                                                              |
| Other and unspecified alcohol dependence, continuous                                | 303,91                                                                              |
| Alcohol abuse, unspecified                                                          | 305.0X                                                                              |
| Alcohol abuse, continuous                                                           | 305,01                                                                              |
| Personal history of alcoholism                                                      | V11.3                                                                               |
| Alcohol use, unspecified                                                            | 790.3, 425.5, 535.30,535.51,577,357.5, 291.x, 303.x,305.0x, V113.0, E860.01-03,980. |
| <b>Alcohol - related Liver disease</b>                                              |                                                                                     |
| Fatty liver, alcoholic                                                              | 571                                                                                 |
| Acute Alcoholic Hepatitis                                                           | 571.1                                                                               |
| Cirrhosis of the liver with alcoholism                                              | 571.2                                                                               |
| Alcoholic Liver Damage, Unspecified                                                 | 571.3                                                                               |
| Alcoholic liver disease                                                             | 571.1,571.2,571.3                                                                   |
| <b>Liver Cirrhosis/Decompensation</b>                                               |                                                                                     |
| Alcoholic cirrhosis of liver                                                        | 571.2                                                                               |
| Chronic Liver disease and cirrhosis                                                 | 571/571.5                                                                           |
| Portal Hypertension                                                                 | 572.3                                                                               |
| Hepatic encephalopathy                                                              | 572.2                                                                               |
| Esophageal varices with bleeding                                                    | 456.0, 456.2                                                                        |
| Esophageal varices without mention of bleeding                                      | 456.1                                                                               |
| Esophageal varices in diseases classified elsewhere with bleeding                   | 456.21                                                                              |

|                                                                                 |               |
|---------------------------------------------------------------------------------|---------------|
| Esophageal varices in diseases classified elsewhere without mention of bleeding | 456.21        |
| Spontaneous bacterial peritonitis                                               | 567.23        |
| Hepatorenal syndrome                                                            | 572.4         |
| Hepatopulmonary syndrome                                                        | 573.5         |
| Ascites                                                                         | 789.5         |
| <b>Psychiatric disorders associated with AUD</b>                                |               |
| Alcohol-induced psychotic disorder                                              | 291.X         |
| Alcohol abuse with Depressive disorders                                         | 296.21-296.36 |
| Alcohol abuse with bipolar-unspecified                                          | 296,8         |
| Alcohol abuse with anxiety state-unspecified                                    | 300.0         |
| Alcohol abuse with panic disorder                                               | 300.01        |
| Alcohol abuse with stress-unspecified                                           | 308.9         |
| Alcohol abuse with history of emotional abuse                                   | V15.42        |
| <b>EXCLUSION CRITERIA</b>                                                       |               |
| Malignant neoplasm of esophagus                                                 | 150.x         |
| Malignant neoplasm of stomach                                                   | 151.x         |
| Malignant neoplasm of small intestine, including duodenum                       | 152.x         |
| Malignant neoplasm of pancreas                                                  | 157.x         |
| Gastric ulcer                                                                   | 531.x         |
| Duodenal ulcer                                                                  | 532.x         |
| Peptic ulcer, sit unspecified                                                   | 533.x         |
| Malignant neoplasm of esophagus                                                 | 150.x         |
| Children and pregnancy                                                          | V22.1         |

Abbreviations: ICD, International Classification of Diseases.
